# Supplementary material
Source: publisher figshare collection journal article supplement (https://sage.figshare.com/ndownloader/files/12957272)
Supplement: Supplementary file 1 [file 12957272]

**HEALTH FOR OAKLAND'S PEOPLE & ENVIRONMENT (HOPE) TRAINING OF TRAINERS LEADERSHIP PROGRAM  
OUTCOMES AND CORE COMPETENCIES**

| SEMINAR                             | TITLE                             | TOPICS                                                                                                                                                                                                                                                                               | CONTENT OUTCOMES<br>Participants will learn...                                                                                                                                                                                                                       | PROCESS OUTCOMES<br>Participants will...                                                                                                                                                                                                                      | CORE COMPETENCIES<br>Participants can...                                                                                                                                                                                                    |
|-------------------------------------|-----------------------------------|--------------------------------------------------------------------------------------------------------------------------------------------------------------------------------------------------------------------------------------------------------------------------------------|----------------------------------------------------------------------------------------------------------------------------------------------------------------------------------------------------------------------------------------------------------------------|---------------------------------------------------------------------------------------------------------------------------------------------------------------------------------------------------------------------------------------------------------------|---------------------------------------------------------------------------------------------------------------------------------------------------------------------------------------------------------------------------------------------|
| <b>TRACK I: SETTING THE CONTEXT</b> |                                   |                                                                                                                                                                                                                                                                                      |                                                                                                                                                                                                                                                                      |                                                                                                                                                                                                                                                               |                                                                                                                                                                                                                                             |
| #1<br>4/5/14<br>AM                  | Forming Our Learning Community    | <ul style="list-style-type: none"> <li>• Launching the Training Program</li> <li>• Program Overview: Program Goals, Curriculum, Participant Learning Goals, Participation Requirements and Project Practicum</li> <li>• Individual Pre-Assessment</li> <li>• Teambuilding</li> </ul> | <ul style="list-style-type: none"> <li>• Basic information about the training program</li> <li>• Teambuilding techniques to build group cohesion</li> <li>• Training requirements for program participants</li> <li>• Personal backgrounds of their peers</li> </ul> | <ul style="list-style-type: none"> <li>• Create ground rules for the learning community</li> <li>• Clarify their learning goals</li> <li>• Share personal stories about their backgrounds</li> <li>• Fill out a pre-assessment form</li> </ul>                | <ul style="list-style-type: none"> <li>• Describe the training program: goals, structure and basic requirements</li> <li>• State their learning goals</li> </ul>                                                                            |
| #2<br>4/5/14<br>PM                  | Looking Back: A Historical Review | <ul style="list-style-type: none"> <li>• History Matters!</li> <li>• Power/Privilege Relationships in Communities</li> </ul>                                                                                                                                                         | <ul style="list-style-type: none"> <li>• Recurring methods of social oppression and political resistance across different historical periods</li> <li>• How social class helps to shape political/social relationships within and across communities</li> </ul>      | <ul style="list-style-type: none"> <li>• Review patterns of social oppression/resistance in US history</li> <li>• Deepen understanding of power dynamics within and across communities</li> <li>• Participate in an evaluation of the training day</li> </ul> | <ul style="list-style-type: none"> <li>• State key lessons learned from the historical review of oppression/resistance patterns in the USA</li> <li>• Describe how power/privilege relationships play out in diverse communities</li> </ul> |

**Agenda Summary**

Morning: (1) Launching the Training Program (welcome, introductions, agenda review, participation guidelines and logistics); (2) Program Overview (program goals, curriculum, participant learning goals, participation requirements and project practicum); (3) Individual Pre-Assessment (knowledge/skills pre-test); and (4) Teambuilding (name game and sharing stories)

Afternoon: (1) History Matters (small group activity where 5 teams review patterns of social oppression and social resistance in different historical periods) and (2) Power/Privilege Relationships (small group activity where teams are assigned a political/social class and role play their status with the full group)

| SEMINAR                                                                                                                                                                                                                                                                                                                                                                                                                          | TITLE                                           | TOPICS                                                                                                                                                | CONTENT OUTCOMES<br>Participants will learn...                                                                                                                                                                                                                                                                                                                         | PROCESS OUTCOMES<br>Participants will...                                                                                                                                                                                                                                                       | CORE COMPETENCIES<br>Participants can...                                                                                                                                                                                                       |
|----------------------------------------------------------------------------------------------------------------------------------------------------------------------------------------------------------------------------------------------------------------------------------------------------------------------------------------------------------------------------------------------------------------------------------|-------------------------------------------------|-------------------------------------------------------------------------------------------------------------------------------------------------------|------------------------------------------------------------------------------------------------------------------------------------------------------------------------------------------------------------------------------------------------------------------------------------------------------------------------------------------------------------------------|------------------------------------------------------------------------------------------------------------------------------------------------------------------------------------------------------------------------------------------------------------------------------------------------|------------------------------------------------------------------------------------------------------------------------------------------------------------------------------------------------------------------------------------------------|
| <b>TRACK 2: SERVING IN A HOPE LEADERSHIP ROLE</b>                                                                                                                                                                                                                                                                                                                                                                                |                                                 |                                                                                                                                                       |                                                                                                                                                                                                                                                                                                                                                                        |                                                                                                                                                                                                                                                                                                |                                                                                                                                                                                                                                                |
| #3<br>4/23/14<br>PM                                                                                                                                                                                                                                                                                                                                                                                                              | Facilitation<br>Techniques That<br>Work         | <ul style="list-style-type: none"> <li>• Teambuilding</li> <li>• The ABC's of Effective Facilitation</li> <li>• Role of Facilitation Teams</li> </ul> | <ul style="list-style-type: none"> <li>• What good facilitators do</li> <li>• Qualities of a good facilitator</li> <li>• Facilitation techniques <ul style="list-style-type: none"> <li>○ Holding good meetings</li> <li>○ Getting people involved</li> <li>○ Handling difficult people or negative situations</li> <li>○ Finding common ground</li> </ul> </li> </ul> | <ul style="list-style-type: none"> <li>• Understand what good facilitators do</li> <li>• Understand how to navigate differences and build a common agenda</li> <li>• Build confidence in their own facilitation ability</li> <li>• Participate in an evaluation of the training day</li> </ul> | <ul style="list-style-type: none"> <li>• Plan and facilitate a meeting with appropriate follow-up</li> <li>• Describe ways to involve people, handle negative situations and deal with difficult people when facilitating a meeting</li> </ul> |
| <p><b>Agenda Summary</b><br/> (1) Opening (welcome, introductions, agenda review and reflections); (2) Teambuilding exercise (TBA); (3) The ABCs of Effective Facilitation (an engaging session where participants do a variety of peer-to-peer exercises to expand knowledge, increase skills and build confidence in their facilitation ability) and (4) Facilitation Teams (forming and orienting the facilitation teams)</p> |                                                 |                                                                                                                                                       |                                                                                                                                                                                                                                                                                                                                                                        |                                                                                                                                                                                                                                                                                                |                                                                                                                                                                                                                                                |
| #4<br>4/30/14<br>PM                                                                                                                                                                                                                                                                                                                                                                                                              | A Comprehensive<br>Community<br>Change Strategy | <ul style="list-style-type: none"> <li>• Teambuilding</li> <li>• Planning for Community Change/Impact</li> <li>• The ABCs of Evaluation</li> </ul>    | <ul style="list-style-type: none"> <li>• An outcomes-focused planning and evaluation process for improving community impact</li> <li>• A seven-step community planning process</li> <li>• A five-step program evaluation process</li> </ul>                                                                                                                            | <ul style="list-style-type: none"> <li>• Rethink their approach to community change work</li> <li>• Build confidence in their ability to change their neighborhoods</li> <li>• Participate in an evaluation of the training day</li> </ul>                                                     | <ul style="list-style-type: none"> <li>• Write a program plan and evaluation strategy for their community project</li> </ul>                                                                                                                   |
| <p><b>Agenda Summary</b><br/> (1) Opening (welcome, introductions, agenda review and reflections); (2) Teambuilding exercise; (3) Planning for Community Change (a working session where participants complete a seven-step planning process to bring about community change) and (2) The ABCs of Evaluation (a working session where participants complete a five-step process for evaluating their community project)</p>      |                                                 |                                                                                                                                                       |                                                                                                                                                                                                                                                                                                                                                                        |                                                                                                                                                                                                                                                                                                |                                                                                                                                                                                                                                                |

| SEMINAR                                                                                                                                                                                                                                                                                                                                                                                                                                                                                                                                | TITLE                                                   | TOPICS                                                                                                                                                                          | CONTENT OUTCOMES<br>Participants will learn...                                                                                                                                                                                                                                        | PROCESS OUTCOMES<br>Participants will...                                                                                                                                                                                                                                                                                                               | CORE COMPETENCIES<br>Participants can...                                                                                                                                                                                                                                                                                       |
|----------------------------------------------------------------------------------------------------------------------------------------------------------------------------------------------------------------------------------------------------------------------------------------------------------------------------------------------------------------------------------------------------------------------------------------------------------------------------------------------------------------------------------------|---------------------------------------------------------|---------------------------------------------------------------------------------------------------------------------------------------------------------------------------------|---------------------------------------------------------------------------------------------------------------------------------------------------------------------------------------------------------------------------------------------------------------------------------------|--------------------------------------------------------------------------------------------------------------------------------------------------------------------------------------------------------------------------------------------------------------------------------------------------------------------------------------------------------|--------------------------------------------------------------------------------------------------------------------------------------------------------------------------------------------------------------------------------------------------------------------------------------------------------------------------------|
| #5<br>5/7/14<br>PM                                                                                                                                                                                                                                                                                                                                                                                                                                                                                                                     | Forming and Sustaining Diverse Community Collaboratives | <ul style="list-style-type: none"> <li>• Teambuilding</li> <li>• Basic Principles and Best Practices for Developing Strong Community Collaboratives</li> </ul>                  | <ul style="list-style-type: none"> <li>• Benefits and challenges of being in a collaborative</li> <li>• Four guiding principles and four best practices for building strong community collaboratives</li> <li>• Common race, class and power issues in diverse communities</li> </ul> | <ul style="list-style-type: none"> <li>• Better understand the process of bringing people together to form a collaborative and keeping them at the table</li> <li>• Have a constructive dialogue about race, class and power issues in communities</li> <li>• Participate in an evaluation of the training day</li> </ul>                              | <ul style="list-style-type: none"> <li>• Explain the benefits of working in a collaborative structure</li> <li>• State core principles and best practices for working with a collaborative</li> </ul>                                                                                                                          |
| <b>Agenda Summary</b><br>(1) Opening (welcome, introductions, agenda review and reflections); (2) Teambuilding exercise; (3) Basic Principles and Best Practices for Developing Strong Community Collaboratives (an interactive session where participants do a variety of peer-to-peer exercises to expand knowledge about community collaboratives and their operations)                                                                                                                                                             |                                                         |                                                                                                                                                                                 |                                                                                                                                                                                                                                                                                       |                                                                                                                                                                                                                                                                                                                                                        |                                                                                                                                                                                                                                                                                                                                |
| #6<br>5/14/14<br>PM                                                                                                                                                                                                                                                                                                                                                                                                                                                                                                                    | The HOPE Collaborative                                  | <ul style="list-style-type: none"> <li>• Teambuilding</li> <li>• Defining Leadership</li> <li>• HOPE Overview</li> <li>• HOPE Leadership Roles for Community Members</li> </ul> | <ul style="list-style-type: none"> <li>• Key definitions of leadership and different leadership styles</li> <li>• HOPE's structure, programs and community engagement strategy</li> <li>• Multiple ways that people can exercise leadership in HOPE</li> </ul>                        | <ul style="list-style-type: none"> <li>• Define leadership and review a taxonomy of leadership styles</li> <li>• Know the benefits and requirements of serving in a HOPE leadership role</li> <li>• Share information about their own leadership experience/involvement in HOPE</li> <li>• Participate in an evaluation of the training day</li> </ul> | <ul style="list-style-type: none"> <li>• Describe the HOPE Collaborative: mission, goals, programs, structure and partner roles</li> <li>• Describe the leadership pathway in HOPE</li> <li>• Identify areas where they want to grow as leaders</li> <li>• State leadership roles that they may want to qualify for</li> </ul> |
| <b>Agenda Summary</b><br>(1) Opening (welcome, introductions, agenda review and reflections); (2) Teambuilding exercise; (3) Defining Leadership (small group activity where paired teams define leadership followed by a plenary session to review a taxonomy of leadership styles); (4) HOPE Overview (PowerPoint presentation/discussion about HOPE); and (5) HOPE Leadership Roles for Community Members (Powerpoint presentation/discussion of HOPE's community engagement strategy and leadership options for community members) |                                                         |                                                                                                                                                                                 |                                                                                                                                                                                                                                                                                       |                                                                                                                                                                                                                                                                                                                                                        |                                                                                                                                                                                                                                                                                                                                |

| SEMINAR                                                                                                                                                                                                                                                                                                                                                                                                                                                                                                                                                                | TITLE                   | TOPICS                                                                                                                                                                                 | CONTENT OUTCOMES<br>Participants will learn...                                                                                                                                                                                                                                             | PROCESS OUTCOMES<br>Participants will...                                                                                                                                                                                                                                                                       | CORE COMPETENCIES<br>Participants can...                                                                                                                                                                   |
|------------------------------------------------------------------------------------------------------------------------------------------------------------------------------------------------------------------------------------------------------------------------------------------------------------------------------------------------------------------------------------------------------------------------------------------------------------------------------------------------------------------------------------------------------------------------|-------------------------|----------------------------------------------------------------------------------------------------------------------------------------------------------------------------------------|--------------------------------------------------------------------------------------------------------------------------------------------------------------------------------------------------------------------------------------------------------------------------------------------|----------------------------------------------------------------------------------------------------------------------------------------------------------------------------------------------------------------------------------------------------------------------------------------------------------------|------------------------------------------------------------------------------------------------------------------------------------------------------------------------------------------------------------|
| #8<br>6/4/14<br>PM                                                                                                                                                                                                                                                                                                                                                                                                                                                                                                                                                     | Conflict Resolution     | <ul style="list-style-type: none"> <li>• Teambuilding</li> <li>• Principles of Community Accountability</li> <li>• Conflict Resolution Process for Community Collaboratives</li> </ul> | <ul style="list-style-type: none"> <li>• Three accountability issues that are often linked to recurring conflicts in community collaboratives (financial, organizational and program/performance accountability)</li> <li>• Basic steps in a conflict resolution process</li> </ul>        | <ul style="list-style-type: none"> <li>• Review case studies and practice how to resolve real conflicts that previously occurred at HOPE</li> <li>• Build confidence in their own conflict resolution ability</li> <li>• Participate in an evaluation of the training day</li> </ul>                           | <ul style="list-style-type: none"> <li>• Plan and facilitate a conflict resolution process</li> <li>• Describe ways to resolve conflicts (one-on-one or intra-group) with collaborative members</li> </ul> |
| <p><b>Agenda Summary</b><br/> (1) Opening (welcome, introductions, agenda review and reflections); (2) Teambuilding exercise; (3) Principles of Community Accountability (review/discussion of four types of community accountability); (4) Conflict Resolution Process for Community Collaboratives (a. presentation/discussion of a conflict resolution process; b. small group activity on “Working with Difficult People”; and c. whole group activity where individual participants share challenging problems followed by discussion of how to address them)</p> |                         |                                                                                                                                                                                        |                                                                                                                                                                                                                                                                                            |                                                                                                                                                                                                                                                                                                                |                                                                                                                                                                                                            |
| #7<br>5/28/14<br>PM                                                                                                                                                                                                                                                                                                                                                                                                                                                                                                                                                    | Effective Communication | <ul style="list-style-type: none"> <li>• Teambuilding</li> <li>• Effective Tips</li> <li>• Pitching Your Project</li> <li>• Being a HOPE Ambassador</li> </ul>                         | <ul style="list-style-type: none"> <li>• The ABCs of Effective Speaking</li> <li>• Talking points for describing their project to others</li> <li>• Talking points for pitching HOPE to key groups (peer organizations, community members, public officials, funders and media)</li> </ul> | <ul style="list-style-type: none"> <li>• Practice describing their project to another person/group</li> <li>• Practice making a presentation about HOPE to a key audience</li> <li>• Build confidence in their own communication skills</li> <li>• Participate in an evaluation of the training day</li> </ul> | <ul style="list-style-type: none"> <li>• Succinctly describe their project to other people/groups</li> <li>• Make a brief presentation on HOPE’s purposes, programs and impacts</li> </ul>                 |
| <p><b>Agenda Summary</b><br/> (1) Opening (welcome, introductions, agenda review and reflections); (2) Teambuilding exercise; (3) Effective Speaking Tips (brief presentation/discussion and “no filler word” exercise); (4) Pitching Your Project (small group activity where everyone makes a project presentation to their group and get peer feedback); and (5) Being a HOPE Ambassador (small group activity where teams develop a brief presentation about HOPE for a designated stakeholder group and make a presentation to the full group)</p>                |                         |                                                                                                                                                                                        |                                                                                                                                                                                                                                                                                            |                                                                                                                                                                                                                                                                                                                |                                                                                                                                                                                                            |

| SEMINAR                                                                                                                                                                                                                                                                                                                                   | TITLE                                                         | TOPICS                                                                                                                                                                         | CONTENT OUTCOMES<br>Participants will learn...                                                                                                                                                                            | PROCESS OUTCOMES<br>Participants will...                                                                                                                                                                                                   | CORE COMPETENCIES<br>Participants can...                                                                                   |
|-------------------------------------------------------------------------------------------------------------------------------------------------------------------------------------------------------------------------------------------------------------------------------------------------------------------------------------------|---------------------------------------------------------------|--------------------------------------------------------------------------------------------------------------------------------------------------------------------------------|---------------------------------------------------------------------------------------------------------------------------------------------------------------------------------------------------------------------------|--------------------------------------------------------------------------------------------------------------------------------------------------------------------------------------------------------------------------------------------|----------------------------------------------------------------------------------------------------------------------------|
| #9 and 10<br>6/11/14<br>and<br>6/18/14<br>PM                                                                                                                                                                                                                                                                                              | Connecting the Dots                                           | <ul style="list-style-type: none"> <li>• Teambuilding</li> <li>• Overview of Training Program</li> <li>• Developing a Community Change Plan and Evaluation Strategy</li> </ul> | <ul style="list-style-type: none"> <li>• Basic concepts and strategies for increasing their effectiveness as community change agents</li> <li>• How to prepare a community change plan and evaluation strategy</li> </ul> | <ul style="list-style-type: none"> <li>• Review what they have learned during the training program</li> <li>• Draft a community change plan and evaluation strategy</li> <li>• Participate in an evaluation of the training day</li> </ul> | <ul style="list-style-type: none"> <li>• Write/describe a community change plan and evaluation strategy</li> </ul>         |
| <b>Agenda Summary</b><br>(1) Opening (welcome, introductions, agenda review and reflections); (2) Teambuilding exercise; (3) Review of Training Program (a full group review of the training program); and (4) Individual Community Change Plans (paired teams that outline individual community change plans and evaluation strategies)  |                                                               |                                                                                                                                                                                |                                                                                                                                                                                                                           |                                                                                                                                                                                                                                            |                                                                                                                            |
| #11<br>6/25/14<br>PM                                                                                                                                                                                                                                                                                                                      | Connecting the Dots (continued from sessions #9 & #10)        | <ul style="list-style-type: none"> <li>• Developing a Community Change Plan and Evaluation Strategy</li> </ul>                                                                 | <ul style="list-style-type: none"> <li>• How to prepare a community change plan and evaluation strategy</li> </ul>                                                                                                        | <ul style="list-style-type: none"> <li>• Write a community change plan and evaluation strategy</li> </ul>                                                                                                                                  | <ul style="list-style-type: none"> <li>• Write/describe a community change plan and evaluation strategy</li> </ul>         |
| <b>Agenda Summary</b><br>(1) An optional tutorial/coaching sessions with individual participants to finalize their community change plan and evaluation strategy                                                                                                                                                                          |                                                               |                                                                                                                                                                                |                                                                                                                                                                                                                           |                                                                                                                                                                                                                                            |                                                                                                                            |
| #12<br>7/2/14<br>PM                                                                                                                                                                                                                                                                                                                       | Connecting the Dots (continued from sessions #9, #10 and #11) | <ul style="list-style-type: none"> <li>• Developing a Community Change Plan and Evaluation Strategy</li> </ul>                                                                 | <ul style="list-style-type: none"> <li>• How to prepare a community change plan and evaluation strategy</li> </ul>                                                                                                        | <ul style="list-style-type: none"> <li>• Write a community change plan and evaluation strategy</li> </ul>                                                                                                                                  | <ul style="list-style-type: none"> <li>• Present a community change plan and evaluation strategy to their peers</li> </ul> |
| <b>Agenda Summary</b><br>(2) Opening (welcome, introductions, agenda review and reflections); (2) Individual presentations; (3) Post-Assessment (knowledge/skills post-test); and (4) Evaluation of Training Program (a full group “delta” discussion of the training program – what worked, what didn’t work and future recommendations) |                                                               |                                                                                                                                                                                |                                                                                                                                                                                                                           |                                                                                                                                                                                                                                            |                                                                                                                            |
